# Supplementary material for: Regulative peroxidase activity of DNA-linked hemin by graphene oxide for fluorescence DNA sensing
Source: Royal Society of Chemistry journal article supplement (doi:10.1039/c4cc02273d), 2014-01-01
Supplement: c4cc02273d1.pdf [file c4cc02273d1.pdf]

Electronic Supplementary Information (ESI) for Chemical Communications

This journal is (c) The Royal Society of Chemistry 2014

# Regulative peroxidase activity of DNA-linked hemin by graphene oxide for fluorescence DNA sensing†

Quanbo Wang, Nan Xu, Jianping Lei and Huangxian Ju\*

State Key Laboratory of Analytical Chemistry for Life Science, School of Chemistry  
and Chemical Engineering, Nanjing University, Nanjing 210093, P.R. China

## Experimental

**Materials and reagents.** Graphene oxide (GO, purity 99%, single layer ratio 99%) was obtained from Nanjing XFNano Materials Tech Co. Ltd. (Nanjing, China). Tyramine, 2',7'-dichlorodihydrofluorescein diacetate (H<sub>2</sub>DCFDA) and tris(hydroxymethyl) aminomethane were purchased from Sigma–Aldrich Inc (USA). Tris–HCl buffer (50 mM, containing 300 mM NaCl, pH 7.4) was used for homogeneous fluorescence measurements. All other reagents were of analytical grade and used without further purification. Ultrapure water obtained from a Millipore water purification system ( $\geq 18$  M $\Omega$ , Milli-Q, Millipore) was used in all assays.

All oligonucleotides were synthesized and purified by TAKARA Biotechnology (Dalian, China), and their sequences are listed in Table S1. The probe (oligo 1) contained a 5'-hemin label, which was characterized with mass spectrum and high-performance liquid chromatography (HPLC). The sequence of target DNA (oligo 2) was perfectly matched to the sequence of the probe. The oligo 3 contained one-base mismatch, while the oligo 4 was a three-base mismatch strand.

Table S1. Oligonucleotides employed in this work

| Oligonucleotides    | Oligonucleotides Sequence         |
|---------------------|-----------------------------------|
| oligo 1 (probe)     | 5'-hemin-CTGTCTTGAACATGAGTT-3'    |
| oligo 2 (target)    | 5'-AACTCATGTTCAAGACAG-3'          |
| oligo 3 (sm-target) | 5'-AACTCATGTTCAAC <u>AC</u> AG-3' |
| oligo 4 (tm-target) | 5'-AACTCAT <u>CTTGAAC</u> ACAG-3' |

**Apparatus and gel electrophoresis.** Fluorescence (FL) spectra were recorded on a RF-5301PC spectrofluorometer (Shimadzu, Japan) equipped with a xenon lamp. To measure catalytic fluorescent signal using tyramine and H<sub>2</sub>DCFDA as substrates, the excitation wavelengths were set to 320 nm and 500 nm, respectively, and the excitation and emission slits were both set to 10 nm. Mass spectrum was recorded on an Autoflex III Smartbeam mass spectrometer (Bruker, Germany). HPLC was performed by a CTO-10AVP system (Shimadzu, Japan).

The 12% native polyacrylamide gel electrophoresis (PAGE) was performed with 5×Tris-Borate-EDTA (TBE) buffer. The loading sample was prepared by mixing 7 μL of DNA sample, 1.5 μL 6×loading buffer with 1.5 μL UltraPower dye, and kept for 3 min so that the dye could integrate with DNA completely. The gel was run at 90 V for 90 min in 1×TBE buffer, and then scanned with Molecular Imager Gel Doc XR (BIO-RAD, USA).

**Inhibition effect of GO toward the probe.** The probe in 50 mM Tris-HCl buffer (pH 7.4, containing 300 mM NaCl) was mixed with the GO for 2 min. Then the non-fluorescent substrate (tyramine or H<sub>2</sub>DCFDA) and H<sub>2</sub>O<sub>2</sub> were added into the mixture to react for 10 min at room temperature, and the fluorescence spectrum was measured. The inhibition efficiency was

calculated with  $[(F_0 - F) / F_0] \times 100\%$ , where  $F_0$  and  $F$  is the fluorescence intensity in absence and presence of GO, respectively.

**Homogenous fluorescence detection of DNA.** After 197  $\mu\text{L}$  mixture of probe (10.15 nM) and target was incubated in 50 mM Tris-HCl buffer (pH 7.4, containing 300 mM NaCl) at 37  $^\circ\text{C}$  for 10 min, 1.0  $\mu\text{L}$  150  $\mu\text{g mL}^{-1}$  GO was added in the mixture to react for 2 min, and then 1.0  $\mu\text{L}$  140 mM non-fluorescent substrat tyramine and 1.0  $\mu\text{L}$  400 mM  $\text{H}_2\text{O}_2$  were added to initiate enzymatic catalysis for 10 min. Finally, the fluorescence spectrum was recorded at an excitation wavelength of 320 nm.

### Characterization of hemin labelled probe

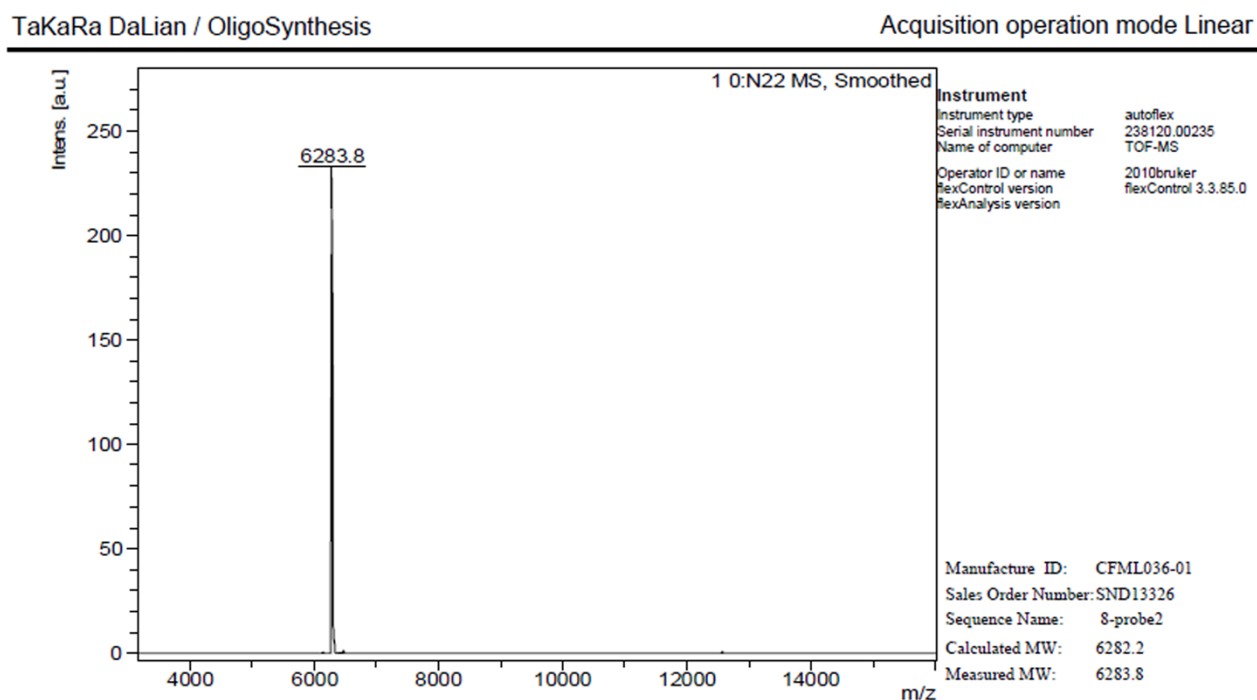

**Fig. S1** Mass spectrum of probe. Calculated MW: 6282.2 ( $\text{M}-\text{Cl}$ )<sup>+</sup>, found MW: 6283.8.

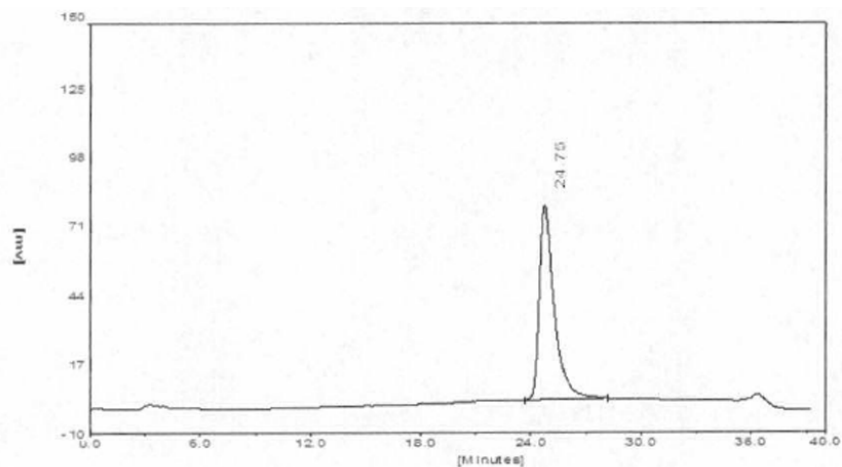

**Detector A (254 nm)**

| Pk#    | RetentionTime | Area    | Area%   | Height | Height% |
|--------|---------------|---------|---------|--------|---------|
| 1      | 24.75         | 4299.63 | 100.000 | 76.05  | 100.000 |
| Totals |               | 4299.63 | 100.000 | 76.05  | 100.000 |

*Fig. S2* HPLC analysis of probe.

**Inhibition effect of GO using H<sub>2</sub>DCFDA as substrate**

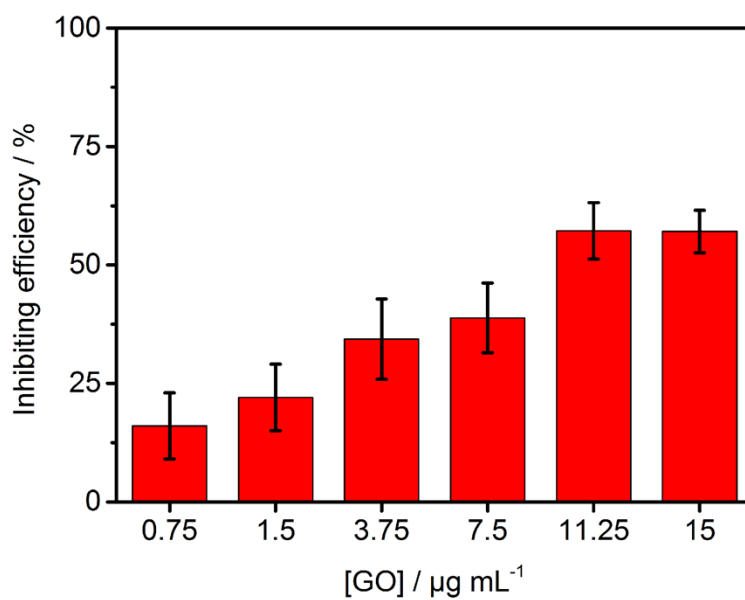

*Fig. S3* The inhibiting efficiency of GO at different concentrations.

### pH dependence of fluorescent signal

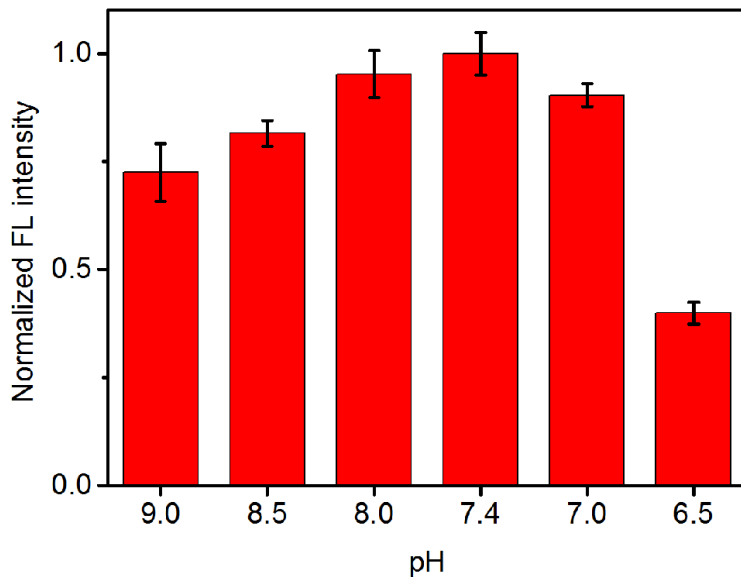

**Fig. S4** Effect of pH on the normalized fluorescent signal. The catalytic reaction is carried out in 50 mM Tris-HCl with 0.7 mM tyramine and 2 mM H<sub>2</sub>O<sub>2</sub>.

### Gel electrophoresis

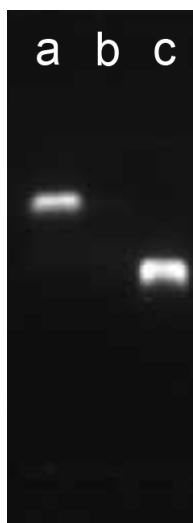

**Fig. S5** PAGE analysis of 1.0  $\mu\text{M}$  probe (lane a), 1.0  $\mu\text{M}$  probe treated with 75  $\mu\text{g mL}^{-1}$  GO for 2 min (lane b) and 1.0  $\mu\text{M}$  probe firstly hybridized with 1.0  $\mu\text{M}$  target at 37  $^{\circ}\text{C}$  for 10 min and subsequently treated with 75  $\mu\text{g mL}^{-1}$  GO for 2 min (lane c).

### Optimization for homogenous fluorescence DNA sensing

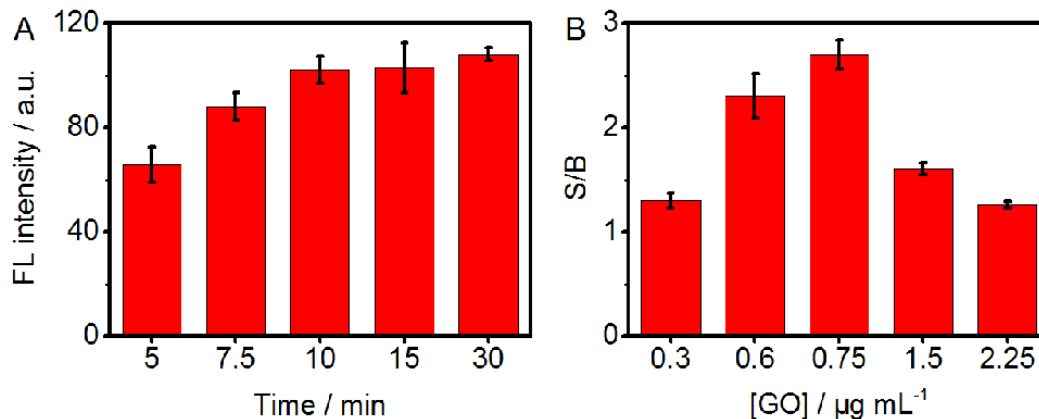

**Fig. S6** Effects of (A) incubation time between 10 nM probe and target at 37 °C on fluorescent signal, and (B) GO concentration on the ratio of catalytic fluorescent signal to background (S/B) in presence of 10 nM probe and target. The catalytic reaction is carried out in 50 mM Tris-HCl (pH 7.4, containing 300 mM NaCl) with 0.7 mM tyramine and 2 mM  $\text{H}_2\text{O}_2$ .

### Specificity of DNA sensing protocol

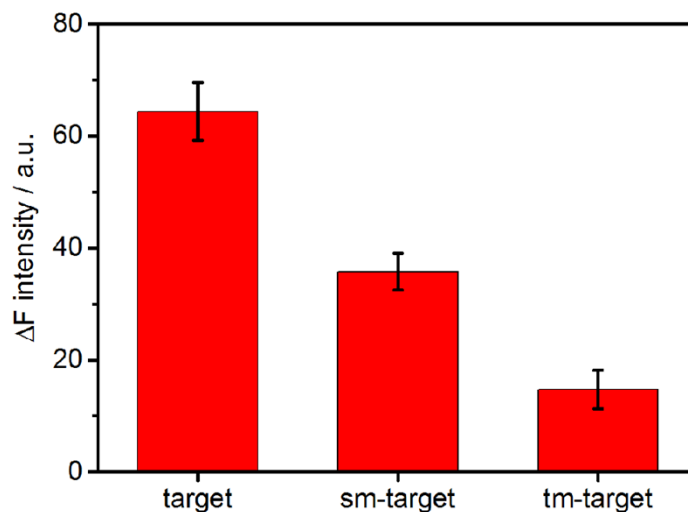

**Fig. S7** Catalytic fluorescence intensity increment ( $\Delta F$ ) of 10 nM probe in the presence of 10 nM complementary target, single-base and three-base mismatched DNA.

## Catalytic reaction of hemin

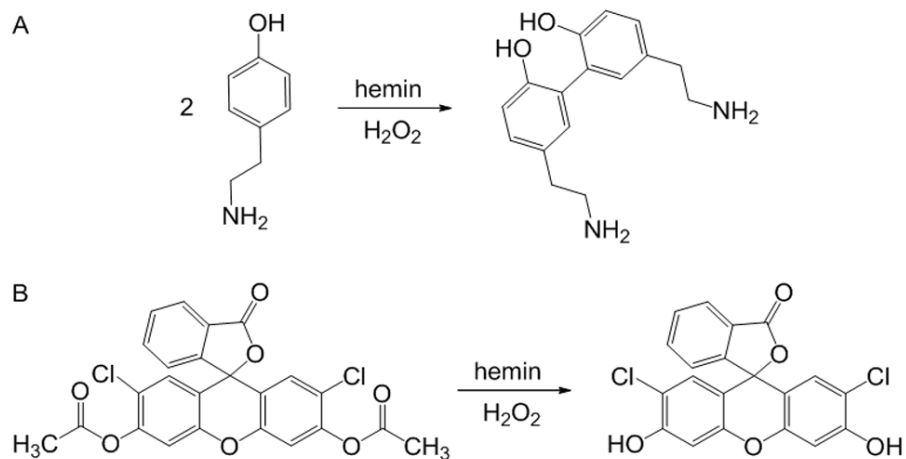

**Scheme S1** The catalytic reactions of non-fluorescent substrates (A) tyramine and (B) H<sub>2</sub>DCFDA for formation of fluorescent products in the presence of hemin and H<sub>2</sub>O<sub>2</sub>.

## Proposed inhibition mechanism

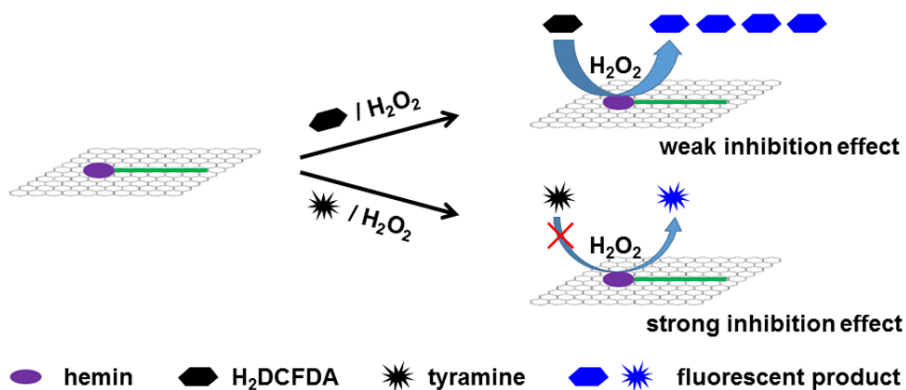

**Scheme S2** The proposed inhibition mechanism of GO toward the peroxidase activity of DNA-linked hemin.

### Conventional fluorescence DNA sensing strategy

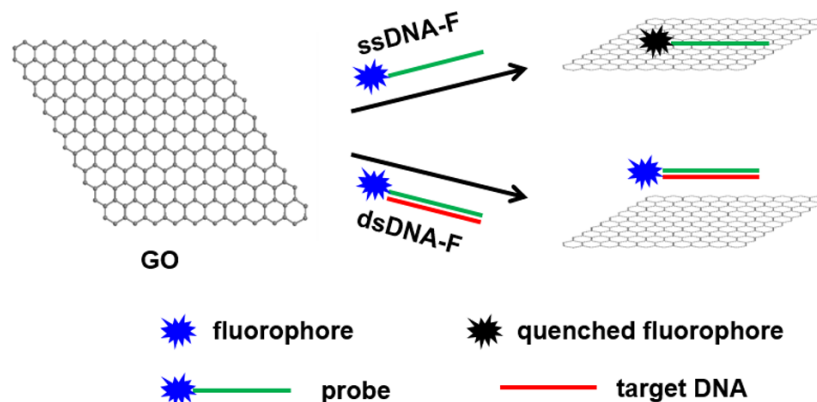

**Scheme S3** Conventional fluorescence DNA sensing strategy using GO as fluorescent quencher and fluorophore labelled on the probe as signal reporter, in which one target DNA could only recover the fluorescence of one fluorophore labelled on the probe.

Table S2. Analytical performances of the proposed and previously reported methods using nanomaterials as quenchers for fluorescence sensing of nucleic acid

| Nanomaterial               | Linear Range     | Detection Limit | Assay Time    | Reference        |
|----------------------------|------------------|-----------------|---------------|------------------|
|                            | <b>0.5-40 nM</b> | <b>0.2 nM</b>   | <b>22 min</b> | <b>this work</b> |
| Graphene oxide             | 50-1500 nM       | 12 nM           | not reported  | S1               |
|                            | not reported     | 5 nM            | 20 min        | S2               |
| Pd nanowire                | 10-100 nM        | 6.0 nM          | > 1 h 20 min  | S3               |
| MoS <sub>2</sub> nanosheet | 0-15 nM          | 0.5 nM          | 15 min        | S4               |
| Metal-organic framework    | 10-100 nM        | 3.0 nM          | > 4 h         | S5               |
| Carbon nitride nanosheet   | 3.0-30 nM        | 2.1 nM          | 12 min        | S6               |



## Supporting references

- [S1] H. F. Dong, W. C. Gao, F. Yan, H. X. Ji and H. X. Ju, *Anal. Chem.*, 2010, **82**, 5511–5517.
- [S2] L. Cui, X. Y. Lin, N. H. Lin, Y. L. Song, Z. Zhu, X. Chen and C. J. Yang, *Chem. Commun.*, 2012, **48**, 194–196.
- [S3] L. B. Zhang, S. J. Guo, S. J. Dong and E. K. Wang, *Anal. Chem.*, 2012, **84**, 3568–3573.
- [S4] C. F. Zhu, Z. Y. Zeng, H. Li, F. Li, C. H. Fan and H. Zhang, *J. Am. Chem. Soc.*, 2013, **135**, 5998–6001.
- [S5] X. Zhu, H. Y. Zheng, X. F. Wei, Z. Y. Lin, L. H. Guo, B. Qiu and G. N. Chen, *Chem. Commun.*, 2013, **49**, 1276–1278.
- [S6] Q. B. Wang, W. Wang, J. P. Lei, N. Xu, F. L. Gao and H. X. Ju, *Anal. Chem.*, 2013, **85**, 12182–12188.
